# Supplementary material for: Transcriptome Analysis and Its Application in Identifying Genes Associated with Fruiting Body Development in Basidiomycete Hypsizygus marmoreus
Source: PubMed Central journal article supplement (PMC4383556; doi:10.1371/journal.pone.0123025), 2015-04-02
Supplement: pone.0123025.s012.pdf [file pone.0123025.s012.pdf]

**S1\_Table.** Primer sets used for quantitative real-time PCR.

| <b>Primer name</b> | <b>Sequence (5'-3')</b>   | <b>Accession No.</b> |
|--------------------|---------------------------|----------------------|
| Unigene3601-F      | AGCACCGCAGGCTCCAGTTA      | KF705537             |
| Unigene3601-R      | ACGAGTAGCACCCGTCCAAA      |                      |
| Unigene1793-F      | AGATAGCCTCGGCGGGATGA      | KF705538             |
| Unigene1793-R      | CAACTTCGGCGGCGTAGAAT      |                      |
| Unigene1639-F      | CCCTCGATGAGTTCTATGC       | KF705539             |
| Unigene1639-R      | AATGTCAGCGTCTTGGTTAG      |                      |
| Unigene2828-F      | GGGGCAAGGAAACGGTGGAA      | KF705540             |
| Unigene2828-R      | ATTGGGATCGGCGAGGAAGG      |                      |
| Unigene2926-F      | GGATAATGGACAAGGAGGATGG    | KF705541             |
| Unigene2926-R      | GCAGTTGGAGTTCCGAAAGTCAT   |                      |
| Unigene4272-F      | GATGAGGGCACCCGATTT        | KF705542             |
| Unigene4272-R      | GTTGGCTGTCTTGCGTCT        |                      |
| Unigene1847-F      | CGTGAAGAATGTGGGTATAAAGG   | KF705543             |
| Unigene1847-R      | GGTCTCCAGGACTAGAATAAGTGTC |                      |
| Unigene2237-F      | ACGCCGTCCACATCTCA         | KF705544             |
| Unigene2237-R      | TCGCAGACAGAGCAGAGCC       |                      |
| Unigene2642-F      | CAGAGCGGAATAAAGGAA        | KF705545             |
| Unigene2642-R      | GAGCCAGTGAATCAGCAT        |                      |
| Unigene4335-F      | TATCCTCCTCCATCCATAACCAC   | KF705546             |
| Unigene4335-R      | CATACGACACCATAAGCACCCCTC  |                      |
| Unigene8326-F      | GGACGAAGCCCGTAAACA        | KF705547             |
| Unigene8326-R      | CGATGCGAAGGAGTCAGC        |                      |
| Unigene365-F       | GTCAAGAGCGAGGACCAGA       | KF705548             |
| Unigene365-R       | ATAGTCGCAGCGGTGATG        |                      |
| Unigene77-F        | GATCACCTCCAACACTACTGC     | KF705549             |
| Unigene77-R        | GAGCGACATAACAACACTTC      |                      |
| Unigene2319-F      | AGGAACTTCTCGCCAAAT        | KF705550             |
| Unigene2319-R      | TACCTAACGCCCTACTCG        |                      |
| Unigene3883-F      | GCTATTCCCTGTTCGCCGTTGT    | KF705551             |
| Unigene3883-R      | ATGGCATTGGTGTTTGAGATTG    |                      |
| Unigene4885- F     | GCCGTCATCACCATTTC         | KF705552             |
| Unigene4885-R      | CGAGGGCGAGTATAGCAGT       |                      |
| Unigene3939-F      | GATTGCACTGACAGGGTC        | KF705553             |
| Unigene3939-R      | GATGGCGGTTACGGTGTT        |                      |
| Unigene922-F       | TTAGGGCACGCACGAAGG        | KF705554             |
| Unigene922-R       | ACAACATCCCGCCACTCC        |                      |
| Unigene2645-F      | GACGCTTCGGTCTTCATT        | KF705555             |
| Unigene2645-R      | CTTTCTGGGATCGTGGTT        |                      |
| Unigene6535-F      | GACCAAGCGACTCGTTTAT       | KF705556             |
| Unigene6535-R      | TCTGGAGTGTATTTGAGGGA      |                      |
| Unigene1821-F      | CACGGGAAGTGAGGATGG        | KF705557             |
| Unigene1821-R      | CCCTGGTTTGGGTGAATA        |                      |

|                |                       |          |
|----------------|-----------------------|----------|
| Unigene14045-F | GCATACGCTGCATTGGTG    | KF705558 |
| Unigene14045-R | TTGTGGGAGGGCATTGTG    |          |
| Unigene204-F   | GAGGCGTTCAAGGTGTC     | KF705559 |
| Unigene204-R   | CTTCCCGAATCATCTCGT    |          |
| Unigene1566-F  | GTATCCATAATTCCTCCACC  | KF705560 |
| Unigene1566-R  | ATCGCTCCTCGCTCTTTT    |          |
| Unigene13536-F | GCCTTTGGTGGTCTTGTG    | KF705561 |
| Unigene13536-R | ATTCAGCGATTTGTCCC     |          |
| Unigene4437-F  | CGGCGTATCAGGACAACT    | KF705562 |
| Unigene4437-R  | GGACGAGACCGTGTAAGTG   |          |
| Unigene6607-F  | AATGGCGAGGTTTATGAC    | KF705563 |
| Unigene6607-R  | TTTAGACTTCCGATGTGGA   |          |
| Unigene2607-F  | ACCGTCAAGAAACACTACCTC | KF705564 |
| Unigene2607-R  | TCATCACAACCTGCACCC    |          |
| Unigene2336-F  | TTTTCAGTATCCCTGTTGG   | KF705565 |
| Unigene2336-R  | TTCTGTGAAGGCATCTCC    |          |
| Unigene261-F   | TGTTTCGGCGGTGTTATTT   | KF705566 |
| Unigene261-R   | ACGTTGGAGGGATGCTGT    |          |
| 18s-F          | GAGGGACCTGAGAAACG     | KC510993 |
| 18s-R          | ATAAGACCCGAAAGAGCC    |          |
