# Supplementary material for: Transcriptome Analysis and Its Application in Identifying Genes Associated with Fruiting Body Development in Basidiomycete Hypsizygus marmoreus
Source: PubMed Central journal article supplement (PMC4383556; doi:10.1371/journal.pone.0123025), 2015-04-02
Supplement: pone.0123025.s013.pdf [file pone.0123025.s013.pdf]

**S2\_Table.** The expression level of 18S ribosomal RNA gene in the RNA-seq data.

| <b>Sample</b> | <b>Count No</b> | <b>RPKM</b> |
|---------------|-----------------|-------------|
| <b>H-M</b>    | 12743           | 1299.25     |
| <b>H-V</b>    | 16269           | 1189.23     |
| <b>H-P</b>    | 16623           | 821.02      |
| <b>H-F</b>    | 14345           | 713.11      |
