# Supplementary material for: Transcriptome Analysis and Its Application in Identifying Genes Associated with Fruiting Body Development in Basidiomycete Hypsizygus marmoreus
Source: PubMed Central journal article supplement (PMC4383556; doi:10.1371/journal.pone.0123025), 2015-04-02
Supplement: pone.0123025.s014.pdf [file pone.0123025.s014.pdf]

**S3\_Table.** The ratio of mapping in each sample.

| <b>Sample</b> | <b>Reads No (pair)</b> | <b>Percentage (%)</b> |
|---------------|------------------------|-----------------------|
| H-F           | 14137348/18020034      | 78.45%                |
| H-M           | 6422523/9599462        | 66.90%                |
| H-P           | 11930924/15629148      | 76.34%                |
| H-V           | 8116009/10768726       | 75.37%                |
