# Supplementary material for: Transcriptome Analysis and Its Application in Identifying Genes Associated with Fruiting Body Development in Basidiomycete Hypsizygus marmoreus
Source: PubMed Central journal article supplement (PMC4383556; doi:10.1371/journal.pone.0123025), 2015-04-02
Supplement: pone.0123025.s015.pdf [file pone.0123025.s015.pdf]

**S4\_Table.** The functional annotation for 31 unigenes from six DGE libraries.

| EST ID            | Gene function                               | E-value  | Accession no. | Organism              |
|-------------------|---------------------------------------------|----------|---------------|-----------------------|
| comp13_c0_seq1    | hydrophobin                                 | 0        | XP_001878874  | L. bicolor            |
| comp173_c0_seq1   | hydrophobin                                 | 0        | BAB84546      | P. nameko             |
| comp1304_c0_seq1  | beta-1,3-glucanase                          | 0        | BAE20245      | L. edode              |
| comp2607_c0_seq7  | Ca-transporting ATPase                      | 0        | EIN0643       | P.<br>strigosoazonata |
| comp2834_c0_seq3  | RhoA GTPase effector                        | 0        | XP_001877017  | L. bicolor            |
| comp3447_c0_seq1  | laccase                                     | 0        | ABY78033      | H. marmoreus          |
| comp412_c0_seq1   | manganese peroxidase                        | 0        | BAA33449      | P. ostreatus          |
| comp4885_c0_seq3  | hydrophobin                                 | 4.00E-25 | EJF63706      | D. squalens           |
| comp1204_c0_seq1  | Protein priA                                | 0        | Q01200        | L. edodes             |
| comp1264_c0_seq8  | activator of Hsp70 and Hsp90 chaperones     | 0        | XP_001877221  | L.bicolor             |
| comp1294_c0_seq10 | glucose-6-P dehydrogenase                   | 0        | XP_001876685  | L. bicolor            |
| comp1296_c0_seq9  | expressed protein                           | 0        | XP_003035340  | S. commune            |
| comp2319_c0_seq1  | alcohol dehydrogenase                       | 0        | EIN11780      | P.<br>strigosoazonata |
| comp2797_c0_seq1  | Ras GTPase activating protein               | 0        | XP_001836503  | C. cinerea            |
| comp2817_c0_seq1  | chitin synthase                             | 0        | BAF41225      | P. ostreatus          |
| comp3444_c0_seq1  | serine threonine protein kinase             | 0        | EHK25855      | T. virens             |
| comp4946_c0_seq6  | actin-related protein                       | 0        | XP_001874573  | L. bicolor            |
| comp4966_c0_seq4  | CMGC/SRPK protein kinase                    | 0        | XP_001828589  | C. cinerea            |
| comp508_c0_seq6   | hydrophobic surface binding protein         | 0        | XP_001882714  | L. bicolor            |
| comp5124_c0_seq5  | AMP binding protein                         | 0        | XP_001830320  | C. cinerea            |
| comp644_c0_seq1   | terpenoid synthase                          | 3.00E-38 | EJF61156      | D.squalens            |
| comp8326_c0_seq1  | STE3-like pheromone receptor                | 0        | XP_001888610  | L.bicolor             |
| comp10091_c0_seq1 | CAMK/CAMKL/PASK protein kinase              | 0        | XP_001830169  | C.cinerea             |
| comp1607_c0_seq2  | beta-glucan synthase                        | 0        | XP_001878782  | L. bicolor            |
| comp1662_c0_seq1  | adenylate kinase                            | 0        | XP_001833219  | C. cinerea            |
| comp3883_c0_seq6  | serine proteinase 2                         | 0        | CAC83024      | A. bisporus           |
| comp5534_c0_seq1  | glucokinase regulator family protein        | 0        | XP_753115     | A. fumigatus          |
| comp5642_c0_seq7  | glucokinase regulator family protein        | 0        | XP_753115     | A. fumigatus          |
| comp3939_c0_seq3  | rho guanine nucleotide exchange factor scd1 | 0        | XP_002911728  | C. cinerea            |

---

|                  |            |          |              |            |
|------------------|------------|----------|--------------|------------|
| comp1847_c0_seq3 | tyrosinase | 6.00E-13 | XP_001885552 | L. bicolor |
|------------------|------------|----------|--------------|------------|

---
