# Supplementary material for: Transcriptome Analysis and Its Application in Identifying Genes Associated with Fruiting Body Development in Basidiomycete Hypsizygus marmoreus
Source: PubMed Central journal article supplement (PMC4383556; doi:10.1371/journal.pone.0123025), 2015-04-02
Supplement: pone.0123025.s016.pdf [file pone.0123025.s016.pdf]

**S5\_Table.** The unigenes of *H. marmoreus* putatively involved in the mTOR signaling pathway.

| <b>EST ID</b>     | <b>Gene name</b> | <b>E-value</b> | <b>Accession no.</b> | <b>Organism</b>                     | <b>KEGG ID</b> |
|-------------------|------------------|----------------|----------------------|-------------------------------------|----------------|
| comp1337_c0_seq1  | EIF4E            | 0              | EGN92279             | <i>S. lacrymans</i>                 | -              |
| comp215_c0_seq1   | RP-S6e           | 0              | XM_002469127         | <i>P. placenta</i>                  | K02991         |
| comp1541_c0_seq1  | EIF4B            | 0              | EGN99014             | <i>S. lacrymans</i>                 | K03258         |
| comp1302_c0_seq1  | RHEB             | 0              | XP_001879802         | <i>L. bicolor</i>                   | K07208         |
| comp14045_c0_seq1 | mTOR             | 0              | XP_001829483         | <i>C. cinerea</i>                   | K07204         |
| comp13536_c0_seq1 | FRAPTOR          | 0              | EGN96671             | <i>S. lacrymans</i>                 | K07203         |
| comp4335_c0_seq1  | ERK1_2           | 0              | EJF57847             | <i>D. qualens</i>                   | K04371         |
| comp1639_c0_seq1  | ERK1_2           | 0              | EGO03785             | <i>S. lacrymans</i>                 | K04371         |
| comp2926_c0_seq1  | CPKC             | 0              | XP_001876242         | <i>L. bicolor</i>                   | K02677         |
| comp1821_c0_seq1  | GBL              | 0              | EIN07757             | <i>P. strigosozon</i><br><i>ata</i> | K08266         |
| comp2950_c1_seq2  | MO25             | 0              | EGO19930             | <i>S. lacrymans</i>                 | K08272         |
| comp5332_c0_seq2  | PDPK1            | 0              | EIN11732             | <i>P. strigosozon</i><br><i>ata</i> | K06276         |
| comp6196_c0_seq1  | ATG1             | 0              | EIN14702             | <i>P. strigosozon</i><br><i>ata</i> | K08269         |
| comp9766_c0_seq1  | RPS6KB           | 8.0E-26        | XP_001769870         | <i>P. patens</i>                    | K04688         |
| comp18380_c0_seq1 | S6K1/2           | 0              | XP_001881407         | <i>L. bicolor</i>                   | -              |
